# Supplementary material
Source: publisher site journal article supplement (https://www.spandidos-publications.com/2696/downloadSupplementary)
Supplement: Supplementary file 1 [file downloadSupplementary]

## Sheet: TargetScan7
Table SI. The potential targets of miR-454-3p predicted by TargetScan.
TargetScan7.0__miR-454-3p.predicted_targets
Target gene	Representative transcript	Gene name	3P-seq tags + 5
SLAIN1	ENST00000418532.1	SLAIN motif family, member 1	842
MDM4	ENST00000391947.2	Mdm4 p53 binding protein homolog (mouse)	443
KLF7	ENST00000309446.6	Kruppel-like factor 7 (ubiquitous)	737
PAN3	ENST00000282391.5	PAN3 poly(A) specific ribonuclease subunit homolog (S. cerevisiae)	361
CHST1	ENST00000308064.2	carbohydrate (keratan sulfate Gal-6) sulfotransferase 1	5
ENPP5	ENST00000371383.2	ectonucleotide pyrophosphatase/phosphodiesterase 5 (putative)	15
FBXO28	ENST00000424254.2	F-box protein 28	461
MYBL1	ENST00000522677.3	v-myb avian myeloblastosis viral oncogene homolog-like 1	53
ACVR1	ENST00000263640.3	activin A receptor, type I	1523
IRF1	ENST00000245414.4	interferon regulatory factor 1	266
SYBU	ENST00000533895.1	syntabulin (syntaxin-interacting)	83
CPEB1	ENST00000450751.2	cytoplasmic polyadenylation element binding protein 1	5
RTCA	ENST00000370128.4	RNA 3'-terminal phosphate cyclase	1093
RPS6KA5	ENST00000261991.3	ribosomal protein S6 kinase, 90kDa, polypeptide 5	64
DYNLL2	ENST00000579991.2	dynein, light chain, LC8-type 2	1162
MAF	ENST00000393350.1	v-maf avian musculoaponeurotic fibrosarcoma oncogene homolog	608
SBF2	ENST00000256190.8	SET binding factor 2	65
RNF38	ENST00000259605.6	ring finger protein 38	348
TSHZ1	ENST00000322038.5	teashirt zinc finger homeobox 1	174
NFIA	ENST00000403491.3	nuclear factor I/A	5
EREG	ENST00000244869.2	epiregulin	5
RAI2	ENST00000415486.3	retinoic acid induced 2	46
SKIDA1	ENST00000449193.2	SKI/DACH domain containing 1	18
SRSF2	ENST00000392485.2	serine/arginine-rich splicing factor 2	9241
FRZB	ENST00000295113.4	frizzled-related protein	43
ZBTB18	ENST00000358704.4	zinc finger and BTB domain containing 18	935
IGF1	ENST00000337514.6	insulin-like growth factor 1 (somatomedin C)	19
WDR20	ENST00000335263.5	WD repeat domain 20	288
FICD	ENST00000552695.1	FIC domain containing	54
C7orf60	ENST00000297145.4	chromosome 7 open reading frame 60	39
HABP4	ENST00000375251.3	hyaluronan binding protein 4	467
MMGT1	ENST00000305963.2	membrane magnesium transporter 1	113
SH3D19	ENST00000409598.4	SH3 domain containing 19	245
GJA1	ENST00000282561.3	gap junction protein, alpha 1, 43kDa	1732
VPS37A	ENST00000324849.4	vacuolar protein sorting 37 homolog A (S. cerevisiae)	339
HPRT1	ENST00000298556.7	hypoxanthine phosphoribosyltransferase 1	490
BTG1	ENST00000256015.3	B-cell translocation gene 1, anti-proliferative	1677
TMEM55A	ENST00000285419.3	transmembrane protein 55A	151
PPARG	ENST00000397000.1	peroxisome proliferator-activated receptor gamma	861
CALM2	ENST00000272298.7	calmodulin 2 (phosphorylase kinase, delta)	22519
CCDC126	ENST00000307471.3	coiled-coil domain containing 126	846
DDX6	ENST00000264018.4	DEAD (Asp-Glu-Ala-Asp) box helicase 6	11
ZMAT3	ENST00000311417.2	zinc finger, matrin-type 3	459
CD69	ENST00000228434.3	CD69 molecule	5
ESR1	ENST00000440973.1	estrogen receptor 1	5
RAP2C	ENST00000342983.2	RAP2C, member of RAS oncogene family	604
PMEPA1	ENST00000341744.3	prostate transmembrane protein, androgen induced 1	736
TSC1	ENST00000298552.3	tuberous sclerosis 1	838
ZNF3	ENST00000424697.1	zinc finger protein 3	671
KCNJ10	ENST00000368089.3	potassium inwardly-rectifying channel, subfamily J, member 10	5
PIGA	ENST00000542278.1	phosphatidylinositol glycan anchor biosynthesis, class A	104
TES	ENST00000358204.4	testis derived transcript (3 LIM domains)	34
C4orf36	ENST00000473559.1	chromosome 4 open reading frame 36	5
PURG	ENST00000475541.1	purine-rich element binding protein G	29
TROVE2	ENST00000432079.1	TROVE domain family, member 2	380
LDLR	ENST00000558518.1	low density lipoprotein receptor	1462
ULK2	ENST00000395544.4	unc-51 like autophagy activating kinase 2	489
RRAGD	ENST00000369415.4	Ras-related GTP binding D	644
CBFB	ENST00000290858.6	core-binding factor, beta subunit	3904
TGFBR2	ENST00000359013.4	transforming growth factor, beta receptor II (70/80kDa)	2168
HS3ST5	ENST00000312719.5	heparan sulfate (glucosamine) 3-O-sulfotransferase 5	22
CHMP3	ENST00000263856.4	charged multivesicular body protein 3	2466
HBP1	ENST00000222574.4	HMG-box transcription factor 1	167
ZNF217	ENST00000371471.2	zinc finger protein 217	668
RNF103-CHMP3	ENST00000604011.1	RNF103-CHMP3 readthrough	2466
KALRN	ENST00000393496.1	kalirin, RhoGEF kinase	83
KDM2A	ENST00000529006.2	lysine (K)-specific demethylase 2A	729
NPNT	ENST00000379987.2	nephronectin	518
HOXB1	ENST00000239174.6	homeobox B1	5
MIER1	ENST00000357692.2	mesoderm induction early response 1, transcriptional regulator	950
C9orf69	ENST00000561457.1	chromosome 9 open reading frame 69	134
FOSL1	ENST00000448083.2	FOS-like antigen 1	276
SPG20	ENST00000438666.2	spastic paraplegia 20 (Troyer syndrome)	642
MID1IP1	ENST00000336949.6	MID1 interacting protein 1	356
FNDC4	ENST00000264703.3	fibronectin type III domain containing 4	418
QKI	ENST00000392127.2	QKI, KH domain containing, RNA binding	323
CPEB3	ENST00000412050.4	cytoplasmic polyadenylation element binding protein 3	48
FAM175B	ENST00000298492.5	family with sequence similarity 175, member B	525
ACBD5	ENST00000396271.3	acyl-CoA binding domain containing 5	77
ARHGAP12	ENST00000311380.4	Rho GTPase activating protein 12	190
DSEL	ENST00000310045.7	dermatan sulfate epimerase-like	26
ST18	ENST00000276480.7	suppression of tumorigenicity 18 (breast carcinoma) (zinc finger protein)	5
CDK19	ENST00000368911.3	cyclin-dependent kinase 19	51
UBC	ENST00000536769.1	ubiquitin C	11613
MEOX2	ENST00000262041.5	mesenchyme homeobox 2	5
TRERF1	ENST00000541110.1	transcriptional regulating factor 1	52
COX8C	ENST00000342144.2	cytochrome c oxidase subunit VIIIC	5
POU6F1	ENST00000389243.4	POU class 6 homeobox 1	135
SLC2A4RG	ENST00000266077.2	SLC2A4 regulator	2555
PTEN	ENST00000371953.3	phosphatase and tensin homolog	118
KCNA4	ENST00000328224.6	potassium voltage-gated channel, shaker-related subfamily, member 4	5
MTMR6	ENST00000381801.5	myotubularin related protein 6	838
HIVEP2	ENST00000367604.1	human immunodeficiency virus type I enhancer binding protein 2	137
SLC6A6	ENST00000454876.2	solute carrier family 6 (neurotransmitter transporter), member 6	280
C5orf30	ENST00000319933.2	chromosome 5 open reading frame 30	889
MTMR10	ENST00000435680.1	myotubularin related protein 10	30
LONRF1	ENST00000398246.3	LON peptidase N-terminal domain and ring finger 1	36
SNAP25	ENST00000254976.2	synaptosomal-associated protein, 25kDa	54
CPEB2	ENST00000538197.1	cytoplasmic polyadenylation element binding protein 2	367
KLF3	ENST00000261438.5	Kruppel-like factor 3 (basic)	515
ATP2B2	ENST00000352432.4	ATPase, Ca++ transporting, plasma membrane 2	170
EPC2	ENST00000258484.6	enhancer of polycomb homolog 2 (Drosophila)	152
STK33	ENST00000447869.1	serine/threonine kinase 33	13
SMARCD2	ENST00000448276.2	SWI/SNF related, matrix associated, actin dependent regulator of chromatin, subfamily d, member 2	144
ZBTB4	ENST00000380599.4	zinc finger and BTB domain containing 4	1039
RBM25	ENST00000261973.7	RNA binding motif protein 25	1190
DYNC1LI2	ENST00000258198.2	dynein, cytoplasmic 1, light intermediate chain 2	137
RAB30	ENST00000533486.1	RAB30, member RAS oncogene family	274
CCNY	ENST00000374706.1	cyclin Y	672
FMR1	ENST00000370471.3	fragile X mental retardation 1	1155
CENPO	ENST00000380834.2	centromere protein O	298
PAPD4	ENST00000453514.1	PAP associated domain containing 4	434
SLC8A1	ENST00000406785.2	solute carrier family 8 (sodium/calcium exchanger), member 1	61
WDR47	ENST00000400794.3	WD repeat domain 47	185
GAREM	ENST00000399218.4	GRB2 associated, regulator of MAPK1	536
JARID2	ENST00000341776.2	jumonji, AT rich interactive domain 2	199
PIK3CB	ENST00000477593.1	phosphatidylinositol-4,5-bisphosphate 3-kinase, catalytic subunit beta	437
G3BP2	ENST00000395719.3	GTPase activating protein (SH3 domain) binding protein 2	4413
IMPDH1	ENST00000419067.2	IMP (inosine 5'-monophosphate) dehydrogenase 1	51
NABP1	ENST00000410026.2	nucleic acid binding protein 1	938
MXD1	ENST00000264444.2	MAX dimerization protein 1	183
STIM2	ENST00000467011.1	stromal interaction molecule 2	380
C16orf70	ENST00000219139.3	chromosome 16 open reading frame 70	485
EPS15	ENST00000371730.2	epidermal growth factor receptor pathway substrate 15	325
ATG16L1	ENST00000392017.4	autophagy related 16-like 1 (S. cerevisiae)	552
WNT2B	ENST00000369686.5	wingless-type MMTV integration site family, member 2B	5
RFX7	ENST00000423270.1	regulatory factor X, 7	1049
PHF14	ENST00000403050.3	PHD finger protein 14	112
KBTBD8	ENST00000295568.4	kelch repeat and BTB (POZ) domain containing 8	22
FAM73A	ENST00000370791.3	family with sequence similarity 73, member A	837
SLC44A1	ENST00000374720.3	solute carrier family 44 (choline transporter), member 1	407
BHLHE41	ENST00000242728.4	basic helix-loop-helix family, member e41	50
UBE2W	ENST00000517608.1	ubiquitin-conjugating enzyme E2W (putative)	102
GDA	ENST00000358399.3	guanine deaminase	5
NPTX1	ENST00000306773.4	neuronal pentraxin I	1876
SLC25A32	ENST00000297578.4	solute carrier family 25 (mitochondrial folate carrier), member 32	554
TMEM159	ENST00000572258.1	transmembrane protein 159	159
RTN1	ENST00000395090.1	reticulon 1	80
GADD45A	ENST00000370986.4	growth arrest and DNA-damage-inducible, alpha	689
FBXO48	ENST00000377957.3	F-box protein 48	13
STX6	ENST00000258301.5	syntaxin 6	348
NPEPL1	ENST00000356091.6	aminopeptidase-like 1	134
LRP8	ENST00000306052.6	low density lipoprotein receptor-related protein 8, apolipoprotein e receptor	16
LCOR	ENST00000371103.3	ligand dependent nuclear receptor corepressor	94
DGKE	ENST00000284061.3	diacylglycerol kinase, epsilon 64kDa	470
HOXA3	ENST00000396352.4	homeobox A3	57
TRPC3	ENST00000264811.5	transient receptor potential cation channel, subfamily C, member 3	37
PCNX	ENST00000304743.2	pecanex homolog (Drosophila)	458
JAKMIP1	ENST00000282924.5	janus kinase and microtubule interacting protein 1	5
ARHGAP24	ENST00000395184.1	Rho GTPase activating protein 24	9
SECISBP2L	ENST00000559471.1	SECIS binding protein 2-like	161
MET	ENST00000397752.3	met proto-oncogene	1155
NRBF2	ENST00000277746.6	nuclear receptor binding factor 2	11
RUNX3	ENST00000399916.1	runt-related transcription factor 3	378
SOS2	ENST00000216373.5	son of sevenless homolog 2 (Drosophila)	70
OTUD3	ENST00000375120.3	OTU domain containing 3	438
SMOC1	ENST00000381280.4	SPARC related modular calcium binding 1	2743
ACPL2	ENST00000286353.4	acid phosphatase-like 2	72
CCT6A	ENST00000275603.4	chaperonin containing TCP1, subunit 6A (zeta 1)	1983
APCDD1	ENST00000355285.5	adenomatosis polyposis coli down-regulated 1	83
SOCS5	ENST00000306503.5	suppressor of cytokine signaling 5	72
RP11-676J12.7	ENST00000576252.1	Uncharacterized protein	5
CDS1	ENST00000295887.5	CDP-diacylglycerol synthase (phosphatidate cytidylyltransferase) 1	720
ENPP6	ENST00000296741.2	ectonucleotide pyrophosphatase/phosphodiesterase 6	5
PTP4A1	ENST00000370651.3	protein tyrosine phosphatase type IVA, member 1	5740
NEUROG1	ENST00000314744.4	neurogenin 1	5
IER3IP1	ENST00000256433.3	immediate early response 3 interacting protein 1	1727
UBXN2B	ENST00000399598.2	UBX domain protein 2B	157
SNX5	ENST00000377759.4	sorting nexin 5	715
FAM107B	ENST00000378470.1	family with sequence similarity 107, member B	403
SOGA2	ENST00000359865.3	SOGA family member 2	47
TMEM110	ENST00000355083.5	transmembrane protein 110	306
TMEM170B	ENST00000379426.1	transmembrane protein 170B	489
MBNL1	ENST00000357472.3	muscleblind-like splicing regulator 1	135
PXK	ENST00000463280.1	PX domain containing serine/threonine kinase	220
FIBIN	ENST00000318627.2	fin bud initiation factor homolog (zebrafish)	135
MAPK6	ENST00000261845.5	mitogen-activated protein kinase 6	24
RBBP8	ENST00000399722.2	retinoblastoma binding protein 8	88
SNX2	ENST00000379516.2	sorting nexin 2	397
HADHA	ENST00000380649.3	hydroxyacyl-CoA dehydrogenase/3-ketoacyl-CoA thiolase/enoyl-CoA hydratase (trifunctional protein), alpha subunit	525
MTMR9	ENST00000221086.3	myotubularin related protein 9	400
ZFPM2	ENST00000407775.2	zinc finger protein, FOG family member 2	595
LRP1B	ENST00000389484.3	low density lipoprotein receptor-related protein 1B	26
PVRL3	ENST00000485303.1	poliovirus receptor-related 3	361
LRIG1	ENST00000273261.3	leucine-rich repeats and immunoglobulin-like domains 1	241
RAB12	ENST00000329286.6	RAB12, member RAS oncogene family	589
UBE3B	ENST00000434735.2	ubiquitin protein ligase E3B	916
FRMD6	ENST00000395718.2	FERM domain containing 6	508
MLLT6	ENST00000325718.7	myeloid/lymphoid or mixed-lineage leukemia (trithorax homolog, Drosophila); translocated to, 6	24
PDE7B	ENST00000308191.6	phosphodiesterase 7B	148
APPL1	ENST00000288266.3	adaptor protein, phosphotyrosine interaction, PH domain and leucine zipper containing 1	908
STX12	ENST00000373943.4	syntaxin 12	1082
SYT6	ENST00000607941.1	synaptotagmin VI	5
CMPK1	ENST00000371873.5	cytidine monophosphate (UMP-CMP) kinase 1, cytosolic	4366
SKP1	ENST00000353411.6	S-phase kinase-associated protein 1	416
ACSL1	ENST00000454703.2	acyl-CoA synthetase long-chain family member 1	121
SULF1	ENST00000458141.2	sulfatase 1	11
RPA2	ENST00000373912.3	replication protein A2, 32kDa	1002
PRKACB	ENST00000370689.2	protein kinase, cAMP-dependent, catalytic, beta	344
DPYSL2	ENST00000311151.5	dihydropyrimidinase-like 2	3087
THOP1	ENST00000307741.6	thimet oligopeptidase 1	15
FAM19A1	ENST00000478136.1	family with sequence similarity 19 (chemokine (C-C motif)-like), member A1	5
MYB	ENST00000367814.4	v-myb avian myeloblastosis viral oncogene homolog	39
SPHK2	ENST00000245222.4	sphingosine kinase 2	142
RAB9B	ENST00000243298.2	RAB9B, member RAS oncogene family	21
WASL	ENST00000223023.4	Wiskott-Aldrich syndrome-like	230
PTPRG	ENST00000474889.1	protein tyrosine phosphatase, receptor type, G	696
ADAM12	ENST00000368679.4	ADAM metallopeptidase domain 12	758
MYT1L	ENST00000399161.2	myelin transcription factor 1-like	5
BAHD1	ENST00000416165.1	bromo adjacent homology domain containing 1	76
ARHGEF4	ENST00000392953.3	Rho guanine nucleotide exchange factor (GEF) 4	189
CLCN6	ENST00000312413.6	chloride channel, voltage-sensitive 6	227
NPAT	ENST00000278612.8	nuclear protein, ataxia-telangiectasia locus	163
RASD1	ENST00000225688.3	RAS, dexamethasone-induced 1	6
CHIC1	ENST00000373504.6	cysteine-rich hydrophobic domain 1	16
FZD6	ENST00000358755.4	frizzled family receptor 6	161
SLC35D1	ENST00000235345.5	solute carrier family 35 (UDP-GlcA/UDP-GalNAc transporter), member D1	186
HECW2	ENST00000260983.3	HECT, C2 and WW domain containing E3 ubiquitin protein ligase 2	28
RASGEF1A	ENST00000374459.1	RasGEF domain family, member 1A	10
AGFG1	ENST00000310078.8	ArfGAP with FG repeats 1	2019
FOXF2	ENST00000259806.1	forkhead box F2	2955
EMX2	ENST00000442245.4	empty spiracles homeobox 2	54
INHBA	ENST00000242208.4	inhibin, beta A	1260
ABHD3	ENST00000289119.2	abhydrolase domain containing 3	228
BACH2	ENST00000257749.4	BTB and CNC homology 1, basic leucine zipper transcription factor 2	74
LMLN	ENST00000330198.4	leishmanolysin-like (metallopeptidase M8 family)	18
POU4F1	ENST00000377208.5	POU class 4 homeobox 1	61
CDADC1	ENST00000251108.6	cytidine and dCMP deaminase domain containing 1	14
ARHGAP1	ENST00000311956.4	Rho GTPase activating protein 1	2229
TNF	ENST00000449264.2	tumor necrosis factor	5
DEDD	ENST00000368006.3	death effector domain containing	239
BMPR2	ENST00000374574.2	bone morphogenetic protein receptor, type II (serine/threonine kinase)	287
CYB5R4	ENST00000369681.5	cytochrome b5 reductase 4	329
FSTL5	ENST00000306100.5	follistatin-like 5	5
NPTN	ENST00000345330.4	neuroplastin	2918
BTF3L4	ENST00000489308.2	basic transcription factor 3-like 4	1245
NHLH2	ENST00000320238.3	nescient helix loop helix 2	16
PRR15	ENST00000319694.2	proline rich 15	244
DENND1A	ENST00000373624.2	DENN/MADD domain containing 1A	2794
PDIK1L	ENST00000374271.4	PDLIM1 interacting kinase 1 like	5
ENAH	ENST00000366844.3	enabled homolog (Drosophila)	415
FAM196B	ENST00000377365.3	family with sequence similarity 196, member B	174
ARID4B	ENST00000349213.3	AT rich interactive domain 4B (RBP1-like)	940
SOX4	ENST00000244745.1	SRY (sex determining region Y)-box 4	2736
ARID5B	ENST00000279873.7	AT rich interactive domain 5B (MRF1-like)	397
FAM104A	ENST00000581110.1	family with sequence similarity 104, member A	2724
ELK3	ENST00000228741.3	ELK3, ETS-domain protein (SRF accessory protein 2)	2719
CEBPE	ENST00000206513.5	CCAAT/enhancer binding protein (C/EBP), epsilon	5
LONRF3	ENST00000304778.7	LON peptidase N-terminal domain and ring finger 3	36
LRP12	ENST00000424843.2	low density lipoprotein receptor-related protein 12	378
NAA30	ENST00000556492.1	N(alpha)-acetyltransferase 30, NatC catalytic subunit	418
AKAP11	ENST00000025301.2	A kinase (PRKA) anchor protein 11	71
PRKAA1	ENST00000397128.2	protein kinase, AMP-activated, alpha 1 catalytic subunit	1415
LCLAT1	ENST00000309052.4	lysocardiolipin acyltransferase 1	397
KLHL3	ENST00000541417.1	kelch-like family member 3	40
NAA50	ENST00000240922.3	N(alpha)-acetyltransferase 50, NatE catalytic subunit	260
FAM155A	ENST00000375915.2	family with sequence similarity 155, member A	118
ZIC5	ENST00000267294.4	Zic family member 5	263
UXS1	ENST00000283148.7	UDP-glucuronate decarboxylase 1	234
ST8SIA5	ENST00000315087.7	ST8 alpha-N-acetyl-neuraminide alpha-2,8-sialyltransferase 5	7
TBL1XR1	ENST00000430069.1	transducin (beta)-like 1 X-linked receptor 1	334
SMOC2	ENST00000356284.2	SPARC related modular calcium binding 2	5
ZNF131	ENST00000505606.2	zinc finger protein 131	1015
SPOCK1	ENST00000394945.1	sparc/osteonectin, cwcv and kazal-like domains proteoglycan (testican) 1	935
GLRA3	ENST00000274093.3	glycine receptor, alpha 3	5
WNT10A	ENST00000258411.3	wingless-type MMTV integration site family, member 10A	5
FASTK	ENST00000540185.1	Fas-activated serine/threonine kinase	645
SLC24A2	ENST00000341998.2	solute carrier family 24 (sodium/potassium/calcium exchanger), member 2	5
NEUROD1	ENST00000295108.3	neuronal differentiation 1	5
AGPAT3	ENST00000291572.8	1-acylglycerol-3-phosphate O-acyltransferase 3	2443
CSF1	ENST00000329608.6	colony stimulating factor 1 (macrophage)	290
NR3C2	ENST00000344721.4	nuclear receptor subfamily 3, group C, member 2	425
PTGES3	ENST00000262033.6	prostaglandin E synthase 3 (cytosolic)	93
KCNK10	ENST00000340700.5	potassium channel, subfamily K, member 10	5
ZPLD1	ENST00000306176.1	zona pellucida-like domain containing 1	5
USP28	ENST00000003302.4	ubiquitin specific peptidase 28	85
HOXD1	ENST00000331462.4	homeobox D1	35
DGKH	ENST00000261491.5	diacylglycerol kinase, eta	46
RNF11	ENST00000242719.3	ring finger protein 11	5881
BHLHE40	ENST00000256495.3	basic helix-loop-helix family, member e40	1571
CPEB4	ENST00000265085.5	cytoplasmic polyadenylation element binding protein 4	472
PLEKHF2	ENST00000315367.3	pleckstrin homology domain containing, family F (with FYVE domain) member 2	286
GAP43	ENST00000305124.6	growth associated protein 43	5
CHRM2	ENST00000445907.2	cholinergic receptor, muscarinic 2	5
LDLRAD4	ENST00000399848.3	low density lipoprotein receptor class A domain containing 4	314
DNAJC16	ENST00000375847.3	DnaJ (Hsp40) homolog, subfamily C, member 16	366
CNIH1	ENST00000395573.4	cornichon family AMPA receptor auxiliary protein 1	2182
BRWD1	ENST00000342449.3	bromodomain and WD repeat domain containing 1	96
MDFIC	ENST00000393486.1	MyoD family inhibitor domain containing	601
SERINC3	ENST00000342374.4	serine incorporator 3	1218
ARL6IP1	ENST00000304414.7	ADP-ribosylation factor-like 6 interacting protein 1	25
TMOD1	ENST00000259365.4	tropomodulin 1	115
WDFY3	ENST00000322366.6	WD repeat and FYVE domain containing 3	596
RNF145	ENST00000274542.2	ring finger protein 145	12145
TSPAN3	ENST00000267970.4	tetraspanin 3	9328
ATXN1	ENST00000244769.4	ataxin 1	106
YTHDF2	ENST00000373812.3	YTH domain family, member 2	38
BAI3	ENST00000370598.1	brain-specific angiogenesis inhibitor 3	5
CNOT7	ENST00000361272.4	CCR4-NOT transcription complex, subunit 7	415
USP48	ENST00000400301.1	ubiquitin specific peptidase 48	3036
PHF17	ENST00000226319.6	PHD finger protein 17	1393
CALB1	ENST00000265431.3	calbindin 1, 28kDa	5
ESCO2	ENST00000305188.8	establishment of sister chromatid cohesion N-acetyltransferase 2	157
MAP4	ENST00000383737.4	microtubule-associated protein 4	3914
AR	ENST00000374690.3	androgen receptor	57
DCAF8	ENST00000368073.3	DDB1 and CUL4 associated factor 8	1924
CNOT6	ENST00000393356.1	CCR4-NOT transcription complex, subunit 6	300
SATB1	ENST00000338745.6	SATB homeobox 1	312
POU3F2	ENST00000328345.5	POU class 3 homeobox 2	274
F3	ENST00000334047.7	coagulation factor III (thromboplastin, tissue factor)	13568
MEMO1	ENST00000295065.5	mediator of cell motility 1	89
BTBD7	ENST00000334746.5	BTB (POZ) domain containing 7	590
RAPGEF4	ENST00000409036.1	Rap guanine nucleotide exchange factor (GEF) 4	60
OTX2	ENST00000339475.5	orthodenticle homeobox 2	5
SESTD1	ENST00000428443.3	SEC14 and spectrin domains 1	478
PFN2	ENST00000239940.7	profilin 2	2184
HOMER1	ENST00000334082.6	homer homolog 1 (Drosophila)	394
PAX6	ENST00000419022.1	paired box 6	191
CLIP1	ENST00000361654.4	CAP-GLY domain containing linker protein 1	17
PSD	ENST00000020673.5	pleckstrin and Sec7 domain containing	5
DLL1	ENST00000366756.3	delta-like 1 (Drosophila)	85
PCGF5	ENST00000336126.5	polycomb group ring finger 5	176
MAPRE3	ENST00000233121.2	microtubule-associated protein, RP/EB family, member 3	303
KCNJ15	ENST00000328656.4	potassium inwardly-rectifying channel, subfamily J, member 15	5
KIF13A	ENST00000378814.5	kinesin family member 13A	725
LARP4B	ENST00000316157.3	La ribonucleoprotein domain family, member 4B	705
CNOT6L	ENST00000504123.1	CCR4-NOT transcription complex, subunit 6-like	23
INHBB	ENST00000295228.3	inhibin, beta B	75
PAK6	ENST00000260404.4	p21 protein (Cdc42/Rac)-activated kinase 6	70
FANCA	ENST00000568369.1	Fanconi anemia, complementation group A	348
CLCN5	ENST00000376088.3	chloride channel, voltage-sensitive 5	154
ARX	ENST00000379044.4	aristaless related homeobox	5
CC2D1B	ENST00000371586.2	coiled-coil and C2 domain containing 1B	42
MSMO1	ENST00000261507.6	methylsterol monooxygenase 1	1413
EDN1	ENST00000379375.5	endothelin 1	113
BMP3	ENST00000282701.2	bone morphogenetic protein 3	36
EGLN3	ENST00000250457.3	egl-9 family hypoxia-inducible factor 3	71
RND2	ENST00000544533.1	Rho family GTPase 2	26
FAM13A	ENST00000395002.2	family with sequence similarity 13, member A	441
DCAF8	ENST00000556710.1	DDB1- and CUL4-associated factor 8	1924
BTAF1	ENST00000265990.6	BTAF1 RNA polymerase II, B-TFIID transcription factor-associated, 170kDa	917
PEX5L	ENST00000467460.1	peroxisomal biogenesis factor 5-like	5
SNIP1	ENST00000296215.6	Smad nuclear interacting protein 1	355
ACBD3	ENST00000366812.5	acyl-CoA binding domain containing 3	828
NAP1L3	ENST00000373079.3	nucleosome assembly protein 1-like 3	5
TMEM63B	ENST00000259746.9	transmembrane protein 63B	557
NUDT10	ENST00000376006.3	nudix (nucleoside diphosphate linked moiety X)-type motif 10	9
CD2AP	ENST00000359314.5	CD2-associated protein	145
MB21D2	ENST00000392452.2	Mab-21 domain containing 2	48
SPRED1	ENST00000299084.4	sprouty-related, EVH1 domain containing 1	547
ARL4A	ENST00000396663.1	ADP-ribosylation factor-like 4A	213
FAM43A	ENST00000329759.4	family with sequence similarity 43, member A	287
PLLP	ENST00000219207.5	plasmolipin	22
TACC2	ENST00000513429.1	transforming, acidic coiled-coil containing protein 2	225
FXR1	ENST00000357559.4	fragile X mental retardation, autosomal homolog 1	434
ARAP2	ENST00000303965.4	ArfGAP with RhoGAP domain, ankyrin repeat and PH domain 2	121
DCP2	ENST00000389063.2	decapping mRNA 2	155
GRB10	ENST00000398812.2	growth factor receptor-bound protein 10	1382
PPP1R15B	ENST00000367188.4	protein phosphatase 1, regulatory subunit 15B	2154
BBX	ENST00000415149.2	bobby sox homolog (Drosophila)	141
USP47	ENST00000339865.5	ubiquitin specific peptidase 47	665
SPOPL	ENST00000280098.4	speckle-type POZ protein-like	216
UTS2B	ENST00000340524.5	urotensin 2B	13
HRK	ENST00000257572.5	harakiri, BCL2 interacting protein (contains only BH3 domain)	19
ARFIP1	ENST00000451320.2	ADP-ribosylation factor interacting protein 1	275
TNFRSF1B	ENST00000376259.3	tumor necrosis factor receptor superfamily, member 1B	243
UBB	ENST00000302182.3	ubiquitin B	1869
VMP1	ENST00000262291.4	vacuole membrane protein 1	2505
GMNC	ENST00000442080.1	geminin coiled-coil domain containing	19
PLAA	ENST00000397292.3	phospholipase A2-activating protein	416
S1PR2	ENST00000590320.1	sphingosine-1-phosphate receptor 2	10
KIAA1468	ENST00000398130.2	KIAA1468	756
FAM46B	ENST00000289166.5	family with sequence similarity 46, member B	18
MLTK	ENST00000338983.3	Mitogen-activated protein kinase kinase kinase MLT	766
VGLL4	ENST00000273038.3	vestigial like 4 (Drosophila)	37
GADD45B	ENST00000215631.4	growth arrest and DNA-damage-inducible, beta	2346
MDGA2	ENST00000426342.1	MAM domain containing glycosylphosphatidylinositol anchor 2	5
LRP6	ENST00000261349.4	low density lipoprotein receptor-related protein 6	157
EFR3A	ENST00000254624.5	EFR3 homolog A (S. cerevisiae)	372
TRIM37	ENST00000262294.7	tripartite motif containing 37	1070
FUT9	ENST00000302103.5	fucosyltransferase 9 (alpha (1,3) fucosyltransferase)	5
HOXB3	ENST00000470495.1	homeobox B3	70
ZNF800	ENST00000393313.1	zinc finger protein 800	239
MAP1B	ENST00000296755.7	microtubule-associated protein 1B	259
ABCB7	ENST00000253577.3	ATP-binding cassette, sub-family B (MDR/TAP), member 7	77
FGF10	ENST00000264664.4	fibroblast growth factor 10	5
TGFBR1	ENST00000374994.4	transforming growth factor, beta receptor 1	249
EOGT	ENST00000383701.3	EGF domain-specific O-linked N-acetylglucosamine (GlcNAc) transferase	302
WRN	ENST00000298139.5	Werner syndrome, RecQ helicase-like	560
SETD7	ENST00000274031.3	SET domain containing (lysine methyltransferase) 7	76
THRA	ENST00000450525.2	thyroid hormone receptor, alpha	547
TSC22D1	ENST00000458659.2	TSC22 domain family, member 1	4146
AKAP1	ENST00000337714.3	A kinase (PRKA) anchor protein 1	843
AJAP1	ENST00000378191.4	adherens junctions associated protein 1	5
CYP2U1	ENST00000332884.6	cytochrome P450, family 2, subfamily U, polypeptide 1	202
PPP6R1	ENST00000412770.2	protein phosphatase 6, regulatory subunit 1	292
S1PR1	ENST00000305352.6	sphingosine-1-phosphate receptor 1	251
MPPED2	ENST00000358117.5	metallophosphoesterase domain containing 2	42
BARHL2	ENST00000370445.4	BarH-like homeobox 2	13
NR2C2AP	ENST00000331552.7	nuclear receptor 2C2-associated protein	8
MAT2B	ENST00000518095.1	methionine adenosyltransferase II, beta	1901
PRRG4	ENST00000257836.3	proline rich Gla (G-carboxyglutamic acid) 4 (transmembrane)	47
PTPN4	ENST00000263708.2	protein tyrosine phosphatase, non-receptor type 4 (megakaryocyte)	215
CAMSAP2	ENST00000358823.2	calmodulin regulated spectrin-associated protein family, member 2	235
CAPRIN2	ENST00000395805.2	caprin family member 2	17
PHAX	ENST00000297540.4	phosphorylated adaptor for RNA export	309
EXOC5	ENST00000413566.2	exocyst complex component 5	242
ZCCHC14	ENST00000268616.4	zinc finger, CCHC domain containing 14	64
UBE2D1	ENST00000373910.4	ubiquitin-conjugating enzyme E2D 1	200
FSD1L	ENST00000374710.3	fibronectin type III and SPRY domain containing 1-like	16
KLHL20	ENST00000209884.4	kelch-like family member 20	324
FOSL2	ENST00000379619.1	FOS-like antigen 2	2255
IQGAP2	ENST00000274364.6	IQ motif containing GTPase activating protein 2	588
CHMP4B	ENST00000217402.2	charged multivesicular body protein 4B	1230
PSAP	ENST00000394936.3	prosaposin	8630
KIAA1211	ENST00000504228.1	KIAA1211	631
PNRC1	ENST00000336032.3	proline-rich nuclear receptor coactivator 1	413
CDKN1A	ENST00000244741.5	cyclin-dependent kinase inhibitor 1A (p21, Cip1)	1458
HIAT1	ENST00000370152.3	hippocampus abundant transcript 1	1473
ZFYVE9	ENST00000371591.1	zinc finger, FYVE domain containing 9	32
SYT10	ENST00000228567.3	synaptotagmin X	5
CEP55	ENST00000371485.3	centrosomal protein 55kDa	92
SMAD5	ENST00000545279.1	SMAD family member 5	225
CCDC6	ENST00000263102.6	coiled-coil domain containing 6	193
FERMT2	ENST00000395631.2	fermitin family member 2	5888
HEG1	ENST00000311127.4	heart development protein with EGF-like domains 1	380
GTF2H1	ENST00000265963.4	general transcription factor IIH, polypeptide 1, 62kDa	121
MFSD6	ENST00000392328.1	major facilitator superfamily domain containing 6	47
BAG5	ENST00000299204.4	BCL2-associated athanogene 5	267
NCKAP5	ENST00000409261.1	NCK-associated protein 5	51
FAM73B	ENST00000358369.4	family with sequence similarity 73, member B	651
PLCL2	ENST00000418129.2	phospholipase C-like 2	122
MAPK1	ENST00000215832.6	mitogen-activated protein kinase 1	630
CNR1	ENST00000369501.2	cannabinoid receptor 1 (brain)	40
FAM155B	ENST00000252338.4	family with sequence similarity 155, member B	21
NOL4	ENST00000261592.5	nucleolar protein 4	12
TAF4	ENST00000252996.4	TAF4 RNA polymerase II, TATA box binding protein (TBP)-associated factor, 135kDa	61
CYLD	ENST00000540145.1	cylindromatosis (turban tumor syndrome)	696
PRICKLE2	ENST00000295902.6	prickle homolog 2 (Drosophila)	20
REEP1	ENST00000165698.5	receptor accessory protein 1	49
KIAA0319L	ENST00000325722.3	KIAA0319-like	2090
MYO10	ENST00000513610.1	myosin X	3866
CCDC85A	ENST00000407595.2	coiled-coil domain containing 85A	46
UBAP2L	ENST00000343815.6	ubiquitin associated protein 2-like	3367
RLIM	ENST00000332687.6	ring finger protein, LIM domain interacting	662
AGO4	ENST00000373210.3	argonaute RISC catalytic component 4	96
ALX4	ENST00000329255.3	ALX homeobox 4	52
SLC35F3	ENST00000366618.3	solute carrier family 35, member F3	5
GMFB	ENST00000358056.3	glia maturation factor, beta	15
WRNIP1	ENST00000380769.4	Werner helicase interacting protein 1	931
KIAA2022	ENST00000055682.6	KIAA2022	5
MEX3D	ENST00000402693.4	mex-3 RNA binding family member D	13
SHANK2	ENST00000449833.2	SH3 and multiple ankyrin repeat domains 2	26
ARHGEF26	ENST00000356448.4	Rho guanine nucleotide exchange factor (GEF) 26	164
EIF4E3	ENST00000425534.3	eukaryotic translation initiation factor 4E family member 3	475
MCTP1	ENST00000515393.1	multiple C2 domains, transmembrane 1	81
EPHA7	ENST00000369303.4	EPH receptor A7	213
BTBD3	ENST00000254977.3	BTB (POZ) domain containing 3	3798
TIMP2	ENST00000585421.1	TIMP metallopeptidase inhibitor 2	3147
MDGA2	ENST00000439988.3	MAM domain-containing glycosylphosphatidylinositol anchor protein 2	0
PIKFYVE	ENST00000264380.4	phosphoinositide kinase, FYVE finger containing	107
MAP3K12	ENST00000267079.2	mitogen-activated protein kinase kinase kinase 12	61
PPFIA2	ENST00000549396.1	protein tyrosine phosphatase, receptor type, f polypeptide (PTPRF), interacting protein (liprin), alpha 2	5
SIX4	ENST00000216513.4	SIX homeobox 4	94
ITPR1	ENST00000302640.8	inositol 1,4,5-trisphosphate receptor, type 1	1022
NHSL1	ENST00000427025.2	NHS-like 1	393
COX7A2L	ENST00000378669.1	cytochrome c oxidase subunit VIIa polypeptide 2 like	289
TBPL1	ENST00000237264.4	TBP-like 1	69
SPEN	ENST00000375759.3	spen homolog, transcriptional regulator (Drosophila)	7
B4GALT5	ENST00000371711.4	UDP-Gal:betaGlcNAc beta 1,4- galactosyltransferase, polypeptide 5	1000
USP33	ENST00000370794.3	ubiquitin specific peptidase 33	287
DLG5	ENST00000372391.2	discs, large homolog 5 (Drosophila)	10
MAST2	ENST00000361297.2	microtubule associated serine/threonine kinase 2	1084
PGM2L1	ENST00000298198.4	phosphoglucomutase 2-like 1	183
CCDC71L	ENST00000523505.1	coiled-coil domain containing 71-like	410
ZFAND5	ENST00000237937.3	zinc finger, AN1-type domain 5	2522
RDX	ENST00000343115.4	radixin	44
ENDOD1	ENST00000278505.4	endonuclease domain containing 1	100
SLC25A12	ENST00000422440.2	solute carrier family 25 (aspartate/glutamate carrier), member 12	566
TMEM55B	ENST00000250489.4	transmembrane protein 55B	623
FAM179B	ENST00000382233.2	family with sequence similarity 179, member B	12
DENND4C	ENST00000380432.2	DENN/MADD domain containing 4C	195
GOLT1B	ENST00000540141.1	golgi transport 1B	848
RAB1A	ENST00000409892.1	RAB1A, member RAS oncogene family	472
TTYH3	ENST00000258796.7	tweety family member 3	188
LNPEP	ENST00000231368.5	leucyl/cystinyl aminopeptidase	28
CEP170	ENST00000366542.1	centrosomal protein 170kDa	6
RNF165	ENST00000269439.7	ring finger protein 165	18
LYSMD2	ENST00000267838.3	LysM, putative peptidoglycan-binding, domain containing 2	307
SOCS6	ENST00000397942.3	suppressor of cytokine signaling 6	140
RBM33	ENST00000341148.3	RNA binding motif protein 33	444
LRCH1	ENST00000311191.6	leucine-rich repeats and calponin homology (CH) domain containing 1	381
MCC	ENST00000302475.4	mutated in colorectal cancers	115
ST8SIA3	ENST00000324000.3	ST8 alpha-N-acetyl-neuraminide alpha-2,8-sialyltransferase 3	5
DOCK3	ENST00000266037.9	dedicator of cytokinesis 3	47
MAFB	ENST00000373313.2	v-maf avian musculoaponeurotic fibrosarcoma oncogene homolog B	333
RAB5A	ENST00000273047.4	RAB5A, member RAS oncogene family	68
HCFC2	ENST00000229330.4	host cell factor C2	46
UCP3	ENST00000314032.4	uncoupling protein 3 (mitochondrial, proton carrier)	10
DMRT3	ENST00000190165.2	doublesex and mab-3 related transcription factor 3	21
HOXC8	ENST00000040584.4	homeobox C8	5
RNF180	ENST00000389100.4	ring finger protein 180	18
ABCA1	ENST00000374736.3	ATP-binding cassette, sub-family A (ABC1), member 1	184
GAN	ENST00000568107.2	gigaxonin	185
UNC13A	ENST00000519716.2	unc-13 homolog A (C. elegans)	5
HECTD1	ENST00000553700.1	HECT domain containing E3 ubiquitin protein ligase 1	34
FAM13B	ENST00000033079.3	family with sequence similarity 13, member B	220
ACSL4	ENST00000469796.2	acyl-CoA synthetase long-chain family member 4	229
RALGPS2	ENST00000367635.3	Ral GEF with PH domain and SH3 binding motif 2	201
DCBLD2	ENST00000326840.6	discoidin, CUB and LCCL domain containing 2	798
MYT1	ENST00000328439.1	myelin transcription factor 1	12
GABRB2	ENST00000393959.1	gamma-aminobutyric acid (GABA) A receptor, beta 2	5
BCAT1	ENST00000261192.7	branched chain amino-acid transaminase 1, cytosolic	1346
NRP1	ENST00000374875.1	neuropilin 1	586
ATXN7L1	ENST00000419735.3	ataxin 7-like 1	67
USP8	ENST00000396444.3	ubiquitin specific peptidase 8	109
PLCB1	ENST00000378641.3	phospholipase C, beta 1 (phosphoinositide-specific)	21
NFIB	ENST00000397575.3	nuclear factor I/B	1149
DEPDC1	ENST00000456315.2	DEP domain containing 1	1068
TBC1D8	ENST00000376840.4	TBC1 domain family, member 8 (with GRAM domain)	47
TAF4B	ENST00000269142.5	TAF4b RNA polymerase II, TATA box binding protein (TBP)-associated factor, 105kDa	52
TNFSF10	ENST00000420541.2	tumor necrosis factor (ligand) superfamily, member 10	28
DAAM1	ENST00000395125.1	dishevelled associated activator of morphogenesis 1	167
FBXW11	ENST00000296933.6	F-box and WD repeat domain containing 11	81
TCF4	ENST00000354452.3	transcription factor 4	394
E2F7	ENST00000322886.7	E2F transcription factor 7	308
DCUN1D3	ENST00000324344.4	DCN1, defective in cullin neddylation 1, domain containing 3	53
AGO1	ENST00000373204.4	argonaute RISC catalytic component 1	402
CLTC	ENST00000269122.3	clathrin, heavy chain (Hc)	10702
KATNBL1	ENST00000256544.3	katanin p80 subunit B-like 1	105
PRNP	ENST00000379440.4	prion protein	1136
ARFGEF1	ENST00000262215.3	ADP-ribosylation factor guanine nucleotide-exchange factor 1 (brefeldin A-inhibited)	70
TRIM2	ENST00000338700.5	tripartite motif containing 2	22
USP6	ENST00000250066.6	ubiquitin specific peptidase 6 (Tre-2 oncogene)	5
RAB34	ENST00000447716.1	RAB34, member RAS oncogene family	880
SIRT7	ENST00000328666.6	sirtuin 7	8
QSER1	ENST00000399302.2	glutamine and serine rich 1	34
VGLL2	ENST00000352536.3	vestigial like 2 (Drosophila)	5
LBR	ENST00000272163.4	lamin B receptor	1217
SFMBT1	ENST00000394752.3	Scm-like with four mbt domains 1	116
TESK2	ENST00000372084.1	testis-specific kinase 2	11
CCDC144A	ENST00000443444.2	coiled-coil domain containing 144A	5
CCND3	ENST00000372991.4	cyclin D3	271
DLG2	ENST00000398309.2	discs, large homolog 2 (Drosophila)	15
TRIM3	ENST00000525074.1	tripartite motif containing 3	29
FBXO9	ENST00000244426.6	F-box protein 9	904
MAP3K9	ENST00000554752.2	mitogen-activated protein kinase kinase kinase 9	44
KLHDC8A	ENST00000367155.3	kelch domain containing 8A	8
EGR3	ENST00000317216.2	early growth response 3	21
NEDD4L	ENST00000256832.7	neural precursor cell expressed, developmentally down-regulated 4-like, E3 ubiquitin protein ligase	617
JHDM1D	ENST00000397560.2	jumonji C domain containing histone demethylase 1 homolog D (S. cerevisiae)	470
TGFA	ENST00000445399.1	transforming growth factor, alpha	36
SLC13A2	ENST00000314669.5	solute carrier family 13 (sodium-dependent dicarboxylate transporter), member 2	5
KMT2C	ENST00000262189.6	lysine (K)-specific methyltransferase 2C	417
ROCK2	ENST00000315872.6	Rho-associated, coiled-coil containing protein kinase 2	142
ARHGEF12	ENST00000397843.2	Rho guanine nucleotide exchange factor (GEF) 12	815
STT3B	ENST00000295770.2	STT3B, subunit of the oligosaccharyltransferase complex (catalytic)	4458
LZIC	ENST00000377223.1	leucine zipper and CTNNBIP1 domain containing	508
PDE4D	ENST00000340635.6	phosphodiesterase 4D, cAMP-specific	747
RB1CC1	ENST00000025008.5	RB1-inducible coiled-coil 1	621
MAP7	ENST00000354570.3	microtubule-associated protein 7	444
ERBB3	ENST00000267101.3	v-erb-b2 avian erythroblastic leukemia viral oncogene homolog 3	926
RASSF3	ENST00000542104.1	Ras association (RalGDS/AF-6) domain family member 3	461
CDH20	ENST00000262717.4	cadherin 20, type 2	5
AFF3	ENST00000409236.2	AF4/FMR2 family, member 3	296
ZNF451	ENST00000370708.4	zinc finger protein 451	190
SASH1	ENST00000367467.3	SAM and SH3 domain containing 1	79
SMCR8	ENST00000406438.3	Smith-Magenis syndrome chromosome region, candidate 8	219
SZRD1	ENST00000401089.3	SUZ RNA binding domain containing 1	137
PPP1R9A	ENST00000289495.5	protein phosphatase 1, regulatory subunit 9A	46
ITPKB	ENST00000272117.3	inositol-trisphosphate 3-kinase B	5
NHSL2	ENST00000540800.1	NHS-like 2	5
HECA	ENST00000367658.2	headcase homolog (Drosophila)	783
ITPRIPL2	ENST00000381440.3	inositol 1,4,5-trisphosphate receptor interacting protein-like 2	893
ACER2	ENST00000340967.2	alkaline ceramidase 2	44
BPTF	ENST00000321892.4	bromodomain PHD finger transcription factor	7
SNPH	ENST00000381873.3	syntaphilin	13
SIK1	ENST00000270162.6	salt-inducible kinase 1	2163
ROBO2	ENST00000461745.1	roundabout, axon guidance receptor, homolog 2 (Drosophila)	22
RASGRF2	ENST00000265080.4	Ras protein-specific guanine nucleotide-releasing factor 2	140
ZFP91	ENST00000316059.6	ZFP91 zinc finger protein	688
NDEL1	ENST00000402554.3	nudE neurodevelopment protein 1-like 1	396
GPATCH8	ENST00000591680.1	G patch domain containing 8	337
ARRDC3	ENST00000265138.3	arrestin domain containing 3	1313
CAV2	ENST00000222693.4	caveolin 2	1191
HSPA8	ENST00000532636.1	heat shock 70kDa protein 8	9
ZNF804B	ENST00000333190.4	zinc finger protein 804B	0
NDRG2	ENST00000298687.5	NDRG family member 2	217
FAXC	ENST00000389677.5	failed axon connections homolog (Drosophila)	95
CMPK2	ENST00000256722.5	cytidine monophosphate (UMP-CMP) kinase 2, mitochondrial	13
CHD5	ENST00000262450.3	chromodomain helicase DNA binding protein 5	5
ING1	ENST00000333219.7	inhibitor of growth family, member 1	142
TNRC6A	ENST00000395799.3	trinucleotide repeat containing 6A	267
SATB2	ENST00000417098.1	SATB homeobox 2	820
ANKRD28	ENST00000399451.2	ankyrin repeat domain 28	798
VSIG10	ENST00000359236.5	V-set and immunoglobulin domain containing 10	355
B4GALNT3	ENST00000266383.5	beta-1,4-N-acetyl-galactosaminyl transferase 3	5
PIK3C2A	ENST00000265970.7	phosphatidylinositol-4-phosphate 3-kinase, catalytic subunit type 2 alpha	280
MED12L	ENST00000474524.1	mediator complex subunit 12-like	30
SNX27	ENST00000368843.3	sorting nexin family member 27	46
CSNK1G1	ENST00000303052.7	casein kinase 1, gamma 1	149
PELI1	ENST00000358912.4	pellino E3 ubiquitin protein ligase 1	134
ITFG3	ENST00000399932.3	integrin alpha FG-GAP repeat containing 3	1046
GPR158	ENST00000376351.3	G protein-coupled receptor 158	5
CRISPLD1	ENST00000262207.4	cysteine-rich secretory protein LCCL domain containing 1	358
ENPP4	ENST00000321037.4	ectonucleotide pyrophosphatase/phosphodiesterase 4 (putative)	114
IKZF4	ENST00000262032.5	IKAROS family zinc finger 4 (Eos)	329
SLC9A2	ENST00000233969.2	solute carrier family 9, subfamily A (NHE2, cation proton antiporter 2), member 2	27
KLHL21	ENST00000377663.3	kelch-like family member 21	45
STX7	ENST00000367941.2	syntaxin 7	1395
TMOD3	ENST00000308580.7	tropomodulin 3 (ubiquitous)	1533
USP44	ENST00000552440.1	ubiquitin specific peptidase 44	29
TGOLN2	ENST00000377386.3	trans-golgi network protein 2	1914
NCOA3	ENST00000341724.6	nuclear receptor coactivator 3	282
TMEM236	ENST00000377495.1	transmembrane protein 236	5
TMEM236	ENST00000480516.1		5
STC1	ENST00000290271.2	stanniocalcin 1	2932
STOX2	ENST00000308497.4	storkhead box 2	379
PRUNE2	ENST00000376718.3	prune homolog 2 (Drosophila)	121
ZNRF3	ENST00000544604.2	zinc and ring finger 3	179
AGO2	ENST00000220592.5	argonaute RISC catalytic component 2	350
RARB	ENST00000437042.2	retinoic acid receptor, beta	48
MARCH2	ENST00000602117.1	membrane-associated ring finger (C3HC4) 2, E3 ubiquitin protein ligase	909
R3HDM1	ENST00000264160.4	R3H domain containing 1	195
NME7	ENST00000472647.1	NME/NM23 family member 7	8
ANKFY1	ENST00000341657.4	ankyrin repeat and FYVE domain containing 1	969
SLC4A5	ENST00000423644.1	solute carrier family 4 (sodium bicarbonate cotransporter), member 5	6
IKZF5	ENST00000368886.5	IKAROS family zinc finger 5 (Pegasus)	83
ADAMTS18	ENST00000282849.5	ADAM metallopeptidase with thrombospondin type 1 motif, 18	7
ATG4D	ENST00000309469.4	autophagy related 4D, cysteine peptidase	801
UHRF2	ENST00000276893.5	ubiquitin-like with PHD and ring finger domains 2, E3 ubiquitin protein ligase	64
SLC25A46	ENST00000355943.3	solute carrier family 25, member 46	391
SPIRE1	ENST00000409402.4	spire-type actin nucleation factor 1	103
KLF6	ENST00000542957.1	Kruppel-like factor 6	4644
MLEC	ENST00000228506.3	malectin	12084
MAML3	ENST00000509479.2	mastermind-like 3 (Drosophila)	159
PHF20	ENST00000374012.3	PHD finger protein 20	191
PDGFRA	ENST00000257290.5	platelet-derived growth factor receptor, alpha polypeptide	39
PHACTR2	ENST00000427704.2	phosphatase and actin regulator 2	274
STAT3	ENST00000585517.1	signal transducer and activator of transcription 3 (acute-phase response factor)	478
NCKIPSD	ENST00000416649.2	NCK interacting protein with SH3 domain	4158
RNF216	ENST00000425013.2	ring finger protein 216	649
GGA1	ENST00000343632.4	golgi-associated, gamma adaptin ear containing, ARF binding protein 1	325
MIER3	ENST00000381226.3	mesoderm induction early response 1, family member 3	112
PI4KA	ENST00000255882.6	phosphatidylinositol 4-kinase, catalytic, alpha	5
LRP4	ENST00000378623.1	low density lipoprotein receptor-related protein 4	152
E2F2	ENST00000361729.2	E2F transcription factor 2	96
DLC1	ENST00000276297.4	deleted in liver cancer 1	970
FYCO1	ENST00000296137.2	FYVE and coiled-coil domain containing 1	91
RALBP1	ENST00000383432.3	ralA binding protein 1	134
ITGB8	ENST00000222573.4	integrin, beta 8	17
DIP2C	ENST00000280886.6	DIP2 disco-interacting protein 2 homolog C (Drosophila)	359
LMTK2	ENST00000297293.5	lemur tyrosine kinase 2	51
HOXA5	ENST00000222726.3	homeobox A5	63
PHACTR4	ENST00000373839.3	phosphatase and actin regulator 4	85
AAK1	ENST00000409085.4	AP2 associated kinase 1	27
ZEB1	ENST00000361642.5	zinc finger E-box binding homeobox 1	59
ZBTB16	ENST00000335953.4	zinc finger and BTB domain containing 16	73
TSPAN18	ENST00000340160.3	tetraspanin 18	332
EPC1	ENST00000319778.6	enhancer of polycomb homolog 1 (Drosophila)	102
MUM1L1	ENST00000357175.2	melanoma associated antigen (mutated) 1-like 1	50
VCPIP1	ENST00000310421.4	valosin containing protein (p97)/p47 complex interacting protein 1	228
KLF11	ENST00000305883.1	Kruppel-like factor 11	42
CASD1	ENST00000297273.4	CAS1 domain containing 1	270
NIPA2	ENST00000337451.3	non imprinted in Prader-Willi/Angelman syndrome 2	1288
CADM2	ENST00000383699.3	cell adhesion molecule 2	5
PDE3B	ENST00000282096.4	phosphodiesterase 3B, cGMP-inhibited	258
SOWAHB	ENST00000334306.2	sosondowah ankyrin repeat domain family member B	25
PXDN	ENST00000252804.4	peroxidasin homolog (Drosophila)	872
ATG2B	ENST00000359933.4	autophagy related 2B	146
LIN28A	ENST00000326279.6	lin-28 homolog A (C. elegans)	5
BZRAP1	ENST00000268893.6	benzodiazapine receptor (peripheral) associated protein 1	26
VPS37B	ENST00000267202.2	vacuolar protein sorting 37 homolog B (S. cerevisiae)	261
RASSF2	ENST00000379400.3	Ras association (RalGDS/AF-6) domain family member 2	88
SOX21	ENST00000376945.2	SRY (sex determining region Y)-box 21	6
PTPRJ	ENST00000418331.2	protein tyrosine phosphatase, receptor type, J	145
BAZ1A	ENST00000358716.4	bromodomain adjacent to zinc finger domain, 1A	144
ST3GAL3	ENST00000372377.4	ST3 beta-galactoside alpha-2,3-sialyltransferase 3	135
UGT8	ENST00000310836.6	UDP glycosyltransferase 8	682
TOB2	ENST00000327492.3	transducer of ERBB2, 2	71
CHST11	ENST00000549260.1	carbohydrate (chondroitin 4) sulfotransferase 11	686
TET3	ENST00000409262.3	tet methylcytosine dioxygenase 3	1437
ZDHHC2	ENST00000262096.8	zinc finger, DHHC-type containing 2	171
XPO4	ENST00000400602.2	exportin 4	718
INO80	ENST00000361937.3	INO80 complex subunit	279
KLF13	ENST00000307145.3	Kruppel-like factor 13	5
RNF2	ENST00000367510.3	ring finger protein 2	414
TSPYL2	ENST00000375442.4	TSPY-like 2	270
IL1RAP	ENST00000072516.3	interleukin 1 receptor accessory protein	313
GRIK2	ENST00000413795.1	glutamate receptor, ionotropic, kainate 2	28
DIP2A	ENST00000318711.7	DIP2 disco-interacting protein 2 homolog A (Drosophila)	298
ZDHHC23	ENST00000330212.3	zinc finger, DHHC-type containing 23	10
BRWD3	ENST00000373275.4	bromodomain and WD repeat domain containing 3	506
PROX1	ENST00000366958.4	prospero homeobox 1	131
CANX	ENST00000247461.4	calnexin	17053
GPC6	ENST00000377047.4	glypican 6	410
ZDHHC14	ENST00000359775.5	zinc finger, DHHC-type containing 14	253
THSD7A	ENST00000423059.4	thrombospondin, type I, domain containing 7A	5
TP63	ENST00000392460.3	tumor protein p63	0
AQPEP	ENST00000357872.4	Aminopeptidase Q	11
ATP11A	ENST00000487903.1	ATPase, class VI, type 11A	731
SCML4	ENST00000369022.2	sex comb on midleg-like 4 (Drosophila)	10
KIT	ENST00000288135.5	v-kit Hardy-Zuckerman 4 feline sarcoma viral oncogene homolog	329
ASXL2	ENST00000435504.4	additional sex combs like 2 (Drosophila)	139
YY1	ENST00000262238.4	YY1 transcription factor	1803
RUNX1T1	ENST00000523629.1	runt-related transcription factor 1; translocated to, 1 (cyclin D-related)	9
SLC24A3	ENST00000328041.6	solute carrier family 24 (sodium/potassium/calcium exchanger), member 3	63
TGFB2	ENST00000366930.4	transforming growth factor, beta 2	157
SGTB	ENST00000381007.4	small glutamine-rich tetratricopeptide repeat (TPR)-containing, beta	205
ETV3	ENST00000368192.4	ets variant 3	37
DCUN1D4	ENST00000334635.5	DCN1, defective in cullin neddylation 1, domain containing 4	1118
KLHL15	ENST00000328046.8	kelch-like family member 15	42
AGO3	ENST00000373191.4	argonaute RISC catalytic component 3	198
ZNF784	ENST00000591479.1	zinc finger protein 784	19
DIAPH3	ENST00000400324.4	diaphanous-related formin 3	157
RBM20	ENST00000369519.3	RNA binding motif protein 20	7
PRR5L	ENST00000527487.1	proline rich 5 like	238
TOM1L2	ENST00000581396.1	target of myb1-like 2 (chicken)	35
NACC2	ENST00000371753.1	NACC family member 2, BEN and BTB (POZ) domain containing	172
ZNF275	ENST00000370251.3	zinc finger protein 275	465
PTPN14	ENST00000366956.5	protein tyrosine phosphatase, non-receptor type 14	301
MIB1	ENST00000261537.6	mindbomb E3 ubiquitin protein ligase 1	897
CTIF	ENST00000256413.3	CBP80/20-dependent translation initiation factor	154
YIPF5	ENST00000274496.5	Yip1 domain family, member 5	594
MAML1	ENST00000292599.3	mastermind-like 1 (Drosophila)	910
NBEAL1	ENST00000449802.1	neurobeachin-like 1	42
SLC2A1	ENST00000426263.3	solute carrier family 2 (facilitated glucose transporter), member 1	13928
ANKRD12	ENST00000262126.4	ankyrin repeat domain 12	11
NFIC	ENST00000589123.1	nuclear factor I/C (CCAAT-binding transcription factor)	26
EPHB4	ENST00000360620.3	EPH receptor B4	350
TXNIP	ENST00000369317.4	thioredoxin interacting protein	11
MOB3B	ENST00000262244.5	MOB kinase activator 3B	52
ZC3H12C	ENST00000278590.3	zinc finger CCCH-type containing 12C	150
IGSF3	ENST00000369486.3	immunoglobulin superfamily, member 3	141
TMEM9B	ENST00000309134.5	TMEM9 domain family, member B	195
RACGAP1	ENST00000427314.2	Rac GTPase activating protein 1	19
LRRTM2	ENST00000274711.6	leucine rich repeat transmembrane neuronal 2	5
FBXO10	ENST00000432825.2	F-box protein 10	14
ANKRD52	ENST00000267116.7	ankyrin repeat domain 52	2913
GPCPD1	ENST00000379019.4	glycerophosphocholine phosphodiesterase GDE1 homolog (S. cerevisiae)	155
EFNB2	ENST00000245323.4	ephrin-B2	25
CHD9	ENST00000566029.1	chromodomain helicase DNA binding protein 9	447
MLLT10	ENST00000377072.3	myeloid/lymphoid or mixed-lineage leukemia (trithorax homolog, Drosophila); translocated to, 10	495
ZFC3H1	ENST00000378743.3	zinc finger, C3H1-type containing	129
NUS1	ENST00000368494.3	nuclear undecaprenyl pyrophosphate synthase 1 homolog (S. cerevisiae)	302
SLC25A44	ENST00000359511.4	solute carrier family 25, member 44	760
NEURL1B	ENST00000369800.5	neuralized homolog 1B (Drosophila)	5
DNM2	ENST00000314646.5	dynamin 2	1182
PRKG1	ENST00000373985.1	protein kinase, cGMP-dependent, type I	12
PTPRM	ENST00000332175.8	protein tyrosine phosphatase, receptor type, M	553
TNRC6B	ENST00000335727.9	trinucleotide repeat containing 6B	69
NEK9	ENST00000238616.5	NIMA-related kinase 9	733
UBN2	ENST00000473989.3	ubinuclein 2	238
SALL3	ENST00000575389.2	sal-like 3 (Drosophila)	64
SLC27A1	ENST00000252595.7	solute carrier family 27 (fatty acid transporter), member 1	33
EBF3	ENST00000368648.3	early B-cell factor 3	101
KMT2A	ENST00000534358.1	lysine (K)-specific methyltransferase 2A	1092
ANKRD13C	ENST00000370944.4	ankyrin repeat domain 13C	369
CLOCK	ENST00000309964.4	clock circadian regulator	86
TBCEL	ENST00000422003.2	tubulin folding cofactor E-like	89
KCTD20	ENST00000373731.2	potassium channel tetramerization domain containing 20	88
NAV2	ENST00000360655.4	neuron navigator 2	337
AP005482.1	ENST00000400514.2	Uncharacterized protein	44
SAMD8	ENST00000372687.4	sterile alpha motif domain containing 8	100
NRARP	ENST00000356628.2	NOTCH-regulated ankyrin repeat protein	56
RORB	ENST00000376896.3	RAR-related orphan receptor B	5
IL6ST	ENST00000381287.4	interleukin 6 signal transducer (gp130, oncostatin M receptor)	213
RALGPS1	ENST00000259351.5	Ral GEF with PH domain and SH3 binding motif 1	34
PRKAB1	ENST00000229328.5	protein kinase, AMP-activated, beta 1 non-catalytic subunit	99
ZBTB37	ENST00000367701.5	zinc finger and BTB domain containing 37	213
FIGN	ENST00000333129.3	fidgetin	10
KCNB1	ENST00000371741.4	potassium voltage-gated channel, Shab-related subfamily, member 1	5
SYNM	ENST00000560674.1	synemin, intermediate filament protein	36
PPP6R3	ENST00000393800.2	protein phosphatase 6, regulatory subunit 3	400
TANC1	ENST00000263635.6	tetratricopeptide repeat, ankyrin repeat and coiled-coil containing 1	618
CCRN4L	ENST00000280614.2	CCR4 carbon catabolite repression 4-like (S. cerevisiae)	101
PRR14L	ENST00000434485.1	proline rich 14-like	39
HLF	ENST00000226067.5	hepatic leukemia factor	15
ZCCHC24	ENST00000372336.3	zinc finger, CCHC domain containing 24	359
TAF1D	ENST00000448108.2	TATA box binding protein (TBP)-associated factor, RNA polymerase I, D, 41kDa	132
CBX6	ENST00000407418.3	chromobox homolog 6	215
ITGA9	ENST00000264741.5	integrin, alpha 9	9
IPCEF1	ENST00000265198.4	interaction protein for cytohesin exchange factors 1	16
CREB1	ENST00000432329.2	cAMP responsive element binding protein 1	295
TMEM167B	ENST00000338272.8	transmembrane protein 167B	42
TNRC6C	ENST00000335749.4	trinucleotide repeat containing 6C	248
ITGA11	ENST00000423218.2	integrin, alpha 11	390
NCOA1	ENST00000405141.1	nuclear receptor coactivator 1	200
MPP6	ENST00000222644.5	membrane protein, palmitoylated 6 (MAGUK p55 subfamily member 6)	389
GMEB1	ENST00000373816.1	glucocorticoid modulatory element binding protein 1	154
ZDHHC7	ENST00000313732.4	zinc finger, DHHC-type containing 7	4068
GAPVD1	ENST00000470056.1	GTPase activating protein and VPS9 domains 1	1805
TAOK1	ENST00000261716.3	TAO kinase 1	164
TRPS1	ENST00000395715.3	trichorhinophalangeal syndrome I	94
STARD13	ENST00000336934.5	StAR-related lipid transfer (START) domain containing 13	314
FAM78A	ENST00000372269.3	family with sequence similarity 78, member A	7
LGALSL	ENST00000238875.5	lectin, galactoside-binding-like	334
TMEM151B	ENST00000451188.2	transmembrane protein 151B	5
WHSC1L1	ENST00000317025.8	Wolf-Hirschhorn syndrome candidate 1-like 1	481
OSTF1	ENST00000346234.6	osteoclast stimulating factor 1	107
TFDP2	ENST00000499676.2	transcription factor Dp-2 (E2F dimerization partner 2)	128
SEL1L3	ENST00000399878.3	sel-1 suppressor of lin-12-like 3 (C. elegans)	155
PTPRD	ENST00000381196.4	protein tyrosine phosphatase, receptor type, D	101
TERF2	ENST00000254942.3	telomeric repeat binding factor 2	709
ZADH2	ENST00000322342.3	zinc binding alcohol dehydrogenase domain containing 2	207
RNPEPL1	ENST00000270357.4	arginyl aminopeptidase (aminopeptidase B)-like 1	239
SERBP1	ENST00000370994.4	SERPINE1 mRNA binding protein 1	926
ADARB2	ENST00000381312.1	adenosine deaminase, RNA-specific, B2 (non-functional)	9
SRSF10	ENST00000343255.5	serine/arginine-rich splicing factor 10	1920
SCML2	ENST00000251900.4	sex comb on midleg-like 2 (Drosophila)	7
ITPK1	ENST00000267615.6	inositol-tetrakisphosphate 1-kinase	60
TBC1D12	ENST00000225235.4	TBC1 domain family, member 12	172
KIAA1462	ENST00000375377.1	KIAA1462	360
AMPD3	ENST00000444303.2	adenosine monophosphate deaminase 3	5
KIAA1210	ENST00000402510.2	KIAA1210	5
PAFAH1B1	ENST00000397195.5	platelet-activating factor acetylhydrolase 1b, regulatory subunit 1 (45kDa)	1570
ERBB4	ENST00000342788.4	v-erb-b2 avian erythroblastic leukemia viral oncogene homolog 4	27
ADCY2	ENST00000338316.4	adenylate cyclase 2 (brain)	13
OTUD4	ENST00000454497.2	OTU domain containing 4	18
MBNL3	ENST00000370839.3	muscleblind-like splicing regulator 3	593
SLC39A10	ENST00000409086.3	solute carrier family 39 (zinc transporter), member 10	511
NHS	ENST00000380060.3	Nance-Horan syndrome (congenital cataracts and dental anomalies)	72
PFKFB3	ENST00000379789.4	6-phosphofructo-2-kinase/fructose-2,6-biphosphatase 3	29
SCARA3	ENST00000301904.3	scavenger receptor class A, member 3	5318
ZNF827	ENST00000379448.4	zinc finger protein 827	17
TACC1	ENST00000330691.6	transforming, acidic coiled-coil containing protein 1	186
ATXN2	ENST00000550104.1	ataxin 2	7
EPB41L1	ENST00000441639.1	erythrocyte membrane protein band 4.1-like 1	369
ITGA4	ENST00000397033.2	integrin, alpha 4 (antigen CD49D, alpha 4 subunit of VLA-4 receptor)	29
TGFBRAP1	ENST00000393359.2	transforming growth factor, beta receptor associated protein 1	435
SCRT1	ENST00000332135.4	scratch homolog 1, zinc finger protein (Drosophila)	5
SP1	ENST00000426431.2	Sp1 transcription factor	402
PCYT1B	ENST00000379145.1	phosphate cytidylyltransferase 1, choline, beta	5
ZBTB7A	ENST00000322357.4	zinc finger and BTB domain containing 7A	37
ZNF609	ENST00000326648.3	zinc finger protein 609	103
GRID2	ENST00000282020.4	glutamate receptor, ionotropic, delta 2	5
MTMR12	ENST00000280285.5	myotubularin related protein 12	156
USP13	ENST00000263966.3	ubiquitin specific peptidase 13 (isopeptidase T-3)	379
HIPK3	ENST00000303296.4	homeodomain interacting protein kinase 3	933
INSIG1	ENST00000342407.5	insulin induced gene 1	1776
ERC1	ENST00000355446.5	ELKS/RAB6-interacting/CAST family member 1	159
ADAMTS19	ENST00000274487.4	ADAM metallopeptidase with thrombospondin type 1 motif, 19	8
SLC12A7	ENST00000264930.5	solute carrier family 12 (potassium/chloride transporter), member 7	149
AFAP1L1	ENST00000296721.4	actin filament associated protein 1-like 1	10
IGFBP5	ENST00000233813.4	insulin-like growth factor binding protein 5	10709
ATRN	ENST00000262919.5	attractin	39
RASAL1	ENST00000546530.1	RAS protein activator like 1 (GAP1 like)	12
GPBP1	ENST00000424459.3	GC-rich promoter binding protein 1	732
ERBB2IP	ENST00000284037.5	erbb2 interacting protein	177
KAT7	ENST00000259021.4	K(lysine) acetyltransferase 7	48
TANC2	ENST00000424789.2	tetratricopeptide repeat, ankyrin repeat and coiled-coil containing 2	155
LRCH2	ENST00000317135.8	leucine-rich repeats and calponin homology (CH) domain containing 2	52
PITPNM2	ENST00000280562.5	phosphatidylinositol transfer protein, membrane-associated 2	66
MAFG	ENST00000357736.4	v-maf avian musculoaponeurotic fibrosarcoma oncogene homolog G	5
VANGL1	ENST00000355485.2	VANGL planar cell polarity protein 1	721
WNK3	ENST00000375169.3	WNK lysine deficient protein kinase 3	55
RALGAPA2	ENST00000202677.7	Ral GTPase activating protein, alpha subunit 2 (catalytic)	24
MAP4K4	ENST00000413150.2	mitogen-activated protein kinase kinase kinase kinase 4	1551
BIRC6	ENST00000421745.2	baculoviral IAP repeat containing 6	555
SUV39H1	ENST00000376687.3	suppressor of variegation 3-9 homolog 1 (Drosophila)	499
IL15	ENST00000296545.7	interleukin 15	504
SGCB	ENST00000381431.5	sarcoglycan, beta (43kDa dystrophin-associated glycoprotein)	1795
SYT2	ENST00000367267.1	synaptotagmin II	5
COG5	ENST00000347053.3	component of oligomeric golgi complex 5	455
DDI2	ENST00000480945.1	DNA-damage inducible 1 homolog 2 (S. cerevisiae)	357
TEX261	ENST00000272438.4	testis expressed 261	359
GGA2	ENST00000309859.4	golgi-associated, gamma adaptin ear containing, ARF binding protein 2	645
GATAD2B	ENST00000368655.4	GATA zinc finger domain containing 2B	48
ANKIB1	ENST00000265742.3	ankyrin repeat and IBR domain containing 1	127
STON2	ENST00000267540.2	stonin 2	40
SYNCRIP	ENST00000355238.6	synaptotagmin binding, cytoplasmic RNA interacting protein	4864
RBM17	ENST00000446108.1	RNA binding motif protein 17	449
SBNO1	ENST00000420886.2	strawberry notch homolog 1 (Drosophila)	87
LYSMD3	ENST00000509384.1	LysM, putative peptidoglycan-binding, domain containing 3	92
ACVR1C	ENST00000243349.8	activin A receptor, type IC	27
RAB14	ENST00000373840.4	RAB14, member RAS oncogene family	586
SCUBE3	ENST00000274938.7	signal peptide, CUB domain, EGF-like 3	47
VPS13D	ENST00000358136.3	vacuolar protein sorting 13 homolog D (S. cerevisiae)	290
KIAA1217	ENST00000396445.1	KIAA1217	320
FAM222A	ENST00000538780.1	family with sequence similarity 222, member A	23
PLXDC2	ENST00000377252.4	plexin domain containing 2	506
PPARGC1A	ENST00000264867.2	peroxisome proliferator-activated receptor gamma, coactivator 1 alpha	19
RUNDC1	ENST00000361677.1	RUN domain containing 1	927
SPATA2	ENST00000289431.5	spermatogenesis associated 2	358
SLMAP	ENST00000295951.3	sarcolemma associated protein	208
ATP13A3	ENST00000439040.1	ATPase type 13A3	243
FOXP1	ENST00000318789.4	forkhead box P1	264
CFL2	ENST00000341223.3	cofilin 2 (muscle)	902
NUP133	ENST00000261396.3	nucleoporin 133kDa	2054
RYBP	ENST00000477973.2	RING1 and YY1 binding protein	342
UGCG	ENST00000374279.3	UDP-glucose ceramide glucosyltransferase	1200
SUV420H1	ENST00000304363.4	suppressor of variegation 4-20 homolog 1 (Drosophila)	62
PTBP2	ENST00000609116.1	polypyrimidine tract binding protein 2	70
NFATC2	ENST00000371564.3	nuclear factor of activated T-cells, cytoplasmic, calcineurin-dependent 2	105
KIF5C	ENST00000435030.1	kinesin family member 5C	19
WEE1	ENST00000299613.6	WEE1 homolog (S. pombe)	331
ARHGAP35	ENST00000404338.3	Rho GTPase activating protein 35	278
CLCN3	ENST00000513761.1	chloride channel, voltage-sensitive 3	1142
SPTY2D1	ENST00000336349.5	SPT2, Suppressor of Ty, domain containing 1 (S. cerevisiae)	241
LMBRD2	ENST00000296603.4	LMBR1 domain containing 2	211
SH3PXD2A	ENST00000369774.4	SH3 and PX domains 2A	152
SLC43A2	ENST00000301335.5	solute carrier family 43 (amino acid system L transporter), member 2	68
RAB5B	ENST00000553116.1	RAB5B, member RAS oncogene family	14
SLC12A5	ENST00000243964.3	solute carrier family 12 (potassium/chloride transporter), member 5	5
NIPA1	ENST00000337435.4	non imprinted in Prader-Willi/Angelman syndrome 1	805
AFF1	ENST00000395146.4	AF4/FMR2 family, member 1	28
USP32	ENST00000300896.4	ubiquitin specific peptidase 32	85
RAB10	ENST00000264710.4	RAB10, member RAS oncogene family	998
ROBO1	ENST00000436010.2	roundabout, axon guidance receptor, homolog 1 (Drosophila)	546
CNTNAP5	ENST00000431078.1	contactin associated protein-like 5	5
GPT2	ENST00000340124.4	glutamic pyruvate transaminase (alanine aminotransferase) 2	1750
CUL3	ENST00000264414.4	cullin 3	1476
ZNF704	ENST00000327835.3	zinc finger protein 704	124
ZFP3	ENST00000318833.3	ZFP3 zinc finger protein	29
PHF3	ENST00000262043.3	PHD finger protein 3	505
SUB1	ENST00000265073.4	SUB1 homolog (S. cerevisiae)	242
MECP2	ENST00000303391.6	methyl CpG binding protein 2 (Rett syndrome)	1474
AKIRIN2	ENST00000257787.5	akirin 2	477
WDR7	ENST00000254442.3	WD repeat domain 7	365
CCDC88A	ENST00000336838.6	coiled-coil domain containing 88A	141
BCL2L11	ENST00000393256.3	BCL2-like 11 (apoptosis facilitator)	105
PRKD3	ENST00000379066.1	protein kinase D3	203
SUGT1	ENST00000310528.8	SGT1, suppressor of G2 allele of SKP1 (S. cerevisiae)	430
EFNA5	ENST00000333274.6	ephrin-A5	225
FUBP1	ENST00000370767.1	far upstream element (FUSE) binding protein 1	2021
SOX5	ENST00000546136.1	SRY (sex determining region Y)-box 5	43
TEX2	ENST00000258991.3	testis expressed 2	127
MARK3	ENST00000303622.9	MAP/microtubule affinity-regulating kinase 3	1468
UHMK1	ENST00000538489.1	U2AF homology motif (UHM) kinase 1	48
SPRY4	ENST00000344120.4	sprouty homolog 4 (Drosophila)	110
N4BP1	ENST00000262384.3	NEDD4 binding protein 1	105
PHF12	ENST00000577226.1	PHD finger protein 12	307
NOVA2	ENST00000263257.5	neuro-oncological ventral antigen 2	7
HOOK3	ENST00000307602.4	hook microtubule-tethering protein 3	403
OSBPL6	ENST00000190611.4	oxysterol binding protein-like 6	85
PTGFRN	ENST00000393203.2	prostaglandin F2 receptor inhibitor	591
HHIP	ENST00000296575.3	hedgehog interacting protein	65
TMEM50B	ENST00000542230.2	transmembrane protein 50B	528
TENM1	ENST00000371130.3	teneurin transmembrane protein 1	5
FAT3	ENST00000298047.6	FAT atypical cadherin 3	30
KCNN3	ENST00000271915.4	potassium intermediate/small conductance calcium-activated channel, subfamily N, member 3	5
FYN	ENST00000368682.3	FYN oncogene related to SRC, FGR, YES	2659
ATG14	ENST00000247178.5	autophagy related 14	25
ETNK1	ENST00000266517.4	ethanolamine kinase 1	1047
IGF2BP1	ENST00000290341.3	insulin-like growth factor 2 mRNA binding protein 1	460
DICER1	ENST00000541352.1	dicer 1, ribonuclease type III	25
TNPO1	ENST00000337273.5	transportin 1	2041
LAMC1	ENST00000258341.4	laminin, gamma 1 (formerly LAMB2)	1082
USP46	ENST00000441222.3	ubiquitin specific peptidase 46	180
MTF1	ENST00000373036.4	metal-regulatory transcription factor 1	98
FMNL3	ENST00000335154.5	formin-like 3	132
FAM57A	ENST00000308278.8	family with sequence similarity 57, member A	978
CNOT2	ENST00000229195.3	CCR4-NOT transcription complex, subunit 2	1189
FAM20B	ENST00000263733.4	family with sequence similarity 20, member B	113
CBLB	ENST00000264122.4	Cbl proto-oncogene B, E3 ubiquitin protein ligase	469
VAV2	ENST00000406606.3	vav 2 guanine nucleotide exchange factor	477
BLCAP	ENST00000397137.1	bladder cancer associated protein	38
ADCYAP1	ENST00000579794.1	adenylate cyclase activating polypeptide 1 (pituitary)	35
RPRD1A	ENST00000399022.4	regulation of nuclear pre-mRNA domain containing 1A	333
RPS6KA3	ENST00000379565.3	ribosomal protein S6 kinase, 90kDa, polypeptide 3	769
FZD3	ENST00000240093.3	frizzled family receptor 3	192
CCDC9	ENST00000221922.6	coiled-coil domain containing 9	391
TFCP2L1	ENST00000263707.5	transcription factor CP2-like 1	36
PDE5A	ENST00000354960.3	phosphodiesterase 5A, cGMP-specific	69
WDFY2	ENST00000298125.5	WD repeat and FYVE domain containing 2	85
CDC73	ENST00000367435.3	cell division cycle 73	579
KCNJ6	ENST00000609713.1	potassium inwardly-rectifying channel, subfamily J, member 6	5
DNAL1	ENST00000553645.2	dynein, axonemal, light chain 1	81
FAM53B	ENST00000337318.3	family with sequence similarity 53, member B	27
CREB5	ENST00000357727.2	cAMP responsive element binding protein 5	54
UBE2D3	ENST00000453744.2	ubiquitin-conjugating enzyme E2D 3	2312
DYRK2	ENST00000344096.3	dual-specificity tyrosine-(Y)-phosphorylation regulated kinase 2	1091
ZFYVE26	ENST00000347230.4	zinc finger, FYVE domain containing 26	104
ZBTB7B	ENST00000368426.3	zinc finger and BTB domain containing 7B	179
SMURF2	ENST00000262435.9	SMAD specific E3 ubiquitin protein ligase 2	978
VAPA	ENST00000400000.2	VAMP (vesicle-associated membrane protein)-associated protein A, 33kDa	2926
SOCS2	ENST00000548537.1	suppressor of cytokine signaling 2	89
CCSER2	ENST00000224756.8	coiled-coil serine-rich protein 2	123
PPP2R5E	ENST00000337537.3	protein phosphatase 2, regulatory subunit B', epsilon isoform	23
PKDCC	ENST00000294964.5	protein kinase domain containing, cytoplasmic	123
RMND5A	ENST00000283632.4	required for meiotic nuclear division 5 homolog A (S. cerevisiae)	261
TARDBP	ENST00000240185.3	TAR DNA binding protein	410
BAZ2A	ENST00000379441.3	bromodomain adjacent to zinc finger domain, 2A	48
RXRA	ENST00000481739.1	retinoid X receptor, alpha	609
CCNA2	ENST00000274026.5	cyclin A2	1162
ELL	ENST00000262809.4	elongation factor RNA polymerase II	250
SAR1B	ENST00000402673.2	SAR1 homolog B (S. cerevisiae)	1404
COL9A3	ENST00000343916.3	collagen, type IX, alpha 3	37
ERP44	ENST00000262455.6	endoplasmic reticulum protein 44	1530
C11orf57	ENST00000532163.1	chromosome 11 open reading frame 57	207
NUFIP2	ENST00000225388.4	nuclear fragile X mental retardation protein interacting protein 2	440
SRSF7	ENST00000313117.6	serine/arginine-rich splicing factor 7	16077
LIMD2	ENST00000259006.3	LIM domain containing 2	90
RBFOX2	ENST00000449924.2	RNA binding protein, fox-1 homolog (C. elegans) 2	262
ALG14	ENST00000370205.5	ALG14, UDP-N-acetylglucosaminyltransferase subunit	572
SEC31B	ENST00000370345.3	SEC31 homolog B (S. cerevisiae)	43
CSNK2A1	ENST00000349736.5	casein kinase 2, alpha 1 polypeptide	1927
RNF213	ENST00000582970.1	ring finger protein 213	630
ACVR2A	ENST00000241416.7	activin A receptor, type IIA	109
VGLL3	ENST00000398399.2	vestigial like 3 (Drosophila)	187
UBE2D2	ENST00000398733.3	ubiquitin-conjugating enzyme E2D 2	11458
ZNF711	ENST00000360700.4	zinc finger protein 711	5614
GBX2	ENST00000551105.1	gastrulation brain homeobox 2	53
PXMP4	ENST00000344022.3	peroxisomal membrane protein 4, 24kDa	158
GNPTG	ENST00000204679.4	N-acetylglucosamine-1-phosphate transferase, gamma subunit	677
SIK2	ENST00000304987.3	salt-inducible kinase 2	378
CAST	ENST00000395812.2	calpastatin	4674
INTS8	ENST00000523731.1	integrator complex subunit 8	554
MBD2	ENST00000256429.3	methyl-CpG binding domain protein 2	823
TCIRG1	ENST00000265686.3	T-cell, immune regulator 1, ATPase, H+ transporting, lysosomal V0 subunit A3	2756
FAM216A	ENST00000377673.5	family with sequence similarity 216, member A	1234
PPP6R2	ENST00000359139.3	protein phosphatase 6, regulatory subunit 2	1255
PCYT2	ENST00000538936.2	phosphate cytidylyltransferase 2, ethanolamine	2340
WNK1	ENST00000315939.6	WNK lysine deficient protein kinase 1	950
NCKAP1	ENST00000361354.4	NCK-associated protein 1	700
GPR174	ENST00000276077.1	G protein-coupled receptor 174	5
HOXB2	ENST00000330070.4	homeobox B2	1282
WNT1	ENST00000293549.3	wingless-type MMTV integration site family, member 1	5
DGCR14	ENST00000252137.6	DiGeorge syndrome critical region gene 14	269
ZBTB20	ENST00000462705.1	zinc finger and BTB domain containing 20	5
SND1	ENST00000354725.3	staphylococcal nuclease and tudor domain containing 1	7201
CSMD1	ENST00000400186.3	CUB and Sushi multiple domains 1	5
SLC25A26	ENST00000354883.6	solute carrier family 25 (S-adenosylmethionine carrier), member 26	1791
NRD1	ENST00000352171.7	nardilysin (N-arginine dibasic convertase)	1501
COL19A1	ENST00000322773.4	collagen, type XIX, alpha 1	5
GRIN2A	ENST00000562109.1	glutamate receptor, ionotropic, N-methyl D-aspartate 2A	5
SERPINH1	ENST00000533603.1	serpin peptidase inhibitor, clade H (heat shock protein 47), member 1, (collagen binding protein 1)	5956
ZNF652	ENST00000362063.2	zinc finger protein 652	33
SHC3	ENST00000375835.4	SHC (Src homology 2 domain containing) transforming protein 3	18
MAP3K13	ENST00000448876.1	mitogen-activated protein kinase kinase kinase 13	226
